# Supplementary material for: Prospective Feasibility and Revalidation of the Equine Acute Abdominal Pain Scale (EAAPS) in Clinical Cases of Colic in Horses
Source: PubMed Central journal article supplement (PMC7760242; doi:10.3390/ani10122242), 2020-11-29
Supplement: animals-10-02242-s001.pdf [file animals-10-02242-s001.pdf]

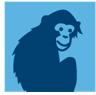

### Questionnaire for Users of

## The Equine Acute Abdominal Pain Scale (EAAPS)

Case no.: \_\_\_\_\_ Date: \_\_\_\_\_ Time: \_\_\_\_\_

Assessor's D.O.B.: \_\_\_\_\_

| Clinician to complete on admission of the horse / pony     |                        |                               |                                                  |                                |                                              |         |
|------------------------------------------------------------|------------------------|-------------------------------|--------------------------------------------------|--------------------------------|----------------------------------------------|---------|
| <i>(Final pain score is the highest scoring-behaviour)</i> |                        |                               |                                                  |                                |                                              |         |
| Equine Acute Abdominal Pain Score (EAAPS)                  | O                      | A                             | B                                                | C                              | D                                            | E       |
|                                                            | No overt signs of pain | Flank watching<br>Lip curling | Sternal recumbency<br>Stretching<br>Restlessness | Kicking belly<br>Pawing ground | Attempting to lie down<br>Lateral recumbency | Rolling |

Please fill in the blanks by choosing the most appropriate word;

**TIME:**

1. I was able to score this horse \_\_\_\_\_;

Very quickly    Quickly    Within a reasonable time    Slowly    Very slowly

**EFFORT:**

2. It was \_\_\_\_\_ to achieve an EAAPS score for this horse;

Very Easy    Easy    Not Easy/Not Difficult    Difficult    Very Difficult

**FAMILIARITY WITH SCORING SYSTEM:**

3. This is the \_\_\_\_\_ time that I have used the EAAPS score;

First    Second    Third    Greater than third    Lost count/can't remember

**SCORE:**

4. (Optional) If I could, I would change the EAAPS by:

---



---



---

**Figure S1.** The Equine Acute Abdominal Pain Scale form used in the UK for data collection. This form was attached to the standard admission forms for cases of colic. The visual analogue scale was embedded in the form in its location prior to this study.

1

**Questionnaire for Users of The Equine Acute Abdominal Pain Scale (EAAPS)**

Please complete this entire form either when the horse demonstrates **pain for the first time** or **before administrating analgesia** if the horse does not show any pain.

Case no.: \_\_\_\_\_ Date: \_\_\_\_\_ Time: \_\_\_\_\_

\*Assessor's name or date of birth: \_\_\_\_\_

\*Please be consistent with your choice.

Mark one: DVM \_\_\_\_\_ Student \_\_\_\_\_ Technician \_\_\_\_\_ Owner \_\_\_\_\_

Location of horse: stocks \_\_\_\_\_ stall \_\_\_\_\_ paddock or roundpen \_\_\_\_\_

Prior analgesia: analgesic \_\_\_\_\_ dose \_\_\_\_\_ administered when? \_\_\_\_\_

**Please mark a cross on the line below so that the distance from the "pain free" side to the mark represents the pain score.**

Pain free = 0 \_\_\_\_\_ 10 = Severe pain

*Pain score = number of mm along the line from the left hand end to the mark*

**IMPORTANT: Please TURN OVER THE PAGE**

**Figure S2.** The Equine Acute Abdominal Pain Scale form used in Israel for data collection. a) page 1; b) page 2; S2a).

PLEASE BEGIN ON OPPOSITE SIDE OF THE PAGE

Please circle any of the behaviours below that the horse is demonstrating. The **final Pain Score** is the letter that applies to the behaviour associated with the cell that is **farthest to the right**.

|                                                  | O                      | A              | B                  | C             | D                      | E       |
|--------------------------------------------------|------------------------|----------------|--------------------|---------------|------------------------|---------|
| <b>Equine Acute Abdominal Pain Score (EAAPS)</b> | No overt signs of pain | Flank watching | Sternal recumbency | Kicking belly | Attempting to lie down | Rolling |
|                                                  |                        | Lip curling    | Stretching         | Pawing ground | Lateral recumbency     |         |
|                                                  |                        |                | Restlessness       |               |                        |         |

**Please fill in the blanks by choosing the most appropriate word:**

**TIME:**

1. I was able to score this horse \_\_\_\_\_;
- Very quickly    Quickly    Within a reasonable time    Slowly    Very slowly

**EFFORT:**

2. It was \_\_\_\_\_ to achieve an EAAPS score for this horse;
- Very Easy    Easy    Not Easy/Not Difficult    Difficult    Very Difficult

**FAMILIARITY WITH SCORING SYSTEM:**

3. This is the \_\_\_\_\_ time that I have used the EAAPS score;
- First    Second    Third    Greater than third    Lost count/can't remember

**SCORE:**

4. (Optional) If I could, I would change the EAAPS by:
- \_\_\_\_\_
- \_\_\_\_\_

**Figure S2.** The Equine Acute Abdominal Pain Scale form used in Israel for data collection. a) page 1; b) page 2; S2b.

**Publisher’s Note:** MDPI stays neutral with regard to jurisdictional claims in published maps and institutional affiliations.

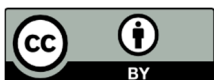

© 2020 by the authors. Licensee MDPI, Basel, Switzerland. This article is an open access article distributed under the terms and conditions of the Creative Commons Attribution (CC BY) license (<http://creativecommons.org/licenses/by/4.0/>).
